1 **Full paper**

2

3 **Title:** Modularity and evolution of flower shape: the role of efficiency, development, and  
4 spandrels in *Erica*

5

6 **Authors:** Dieter Reich<sup>1\*</sup>, Andreas Berger<sup>1\*</sup>, Maria von Balthazar<sup>2</sup>, Marion Chartier<sup>2</sup>,  
7 Mahboubeh Sherafati<sup>3</sup>, Christian P. Klingenberg<sup>4</sup>, Sara Manafzadeh<sup>2</sup>, Yannick M. Staedler<sup>2</sup>

8

9 **Affiliations:**

10 <sup>1</sup> Department of Botany and Biodiversity Research, Division of Evolutionary and Systematic  
11 Botany, University of Vienna, Rennweg 14, 1030 Vienna, Austria

12 <sup>2</sup> Department of Botany and Biodiversity Research, Division of Structural and Functional  
13 Botany, University of Vienna, Rennweg 14, 1030 Vienna, Austria

14 <sup>3</sup> Department of Plant Biology, Faculty of Biological Sciences, Tarbiat Modares University,  
15 Tehran, Iran

16 <sup>4</sup> School of Biological Sciences, University of Manchester, Manchester, United Kingdom

17 \* Equal contribution

18

19 **Corresponding author:** Yannick M. Staedler

20 **Telephone:** +43 1 4277 54084

21 **Email:** [yannick.staedler@univie.ac.at](mailto:yannick.staedler@univie.ac.at)

22

23 Word count for the main body of the text: (Introduction, Materials and Methods, Results,  
24 Discussion, and Acknowledgements): 5490

25 Word count for Introduction: 1648

26 Word count for Materials and methods: 1032

27 Word count for Results: 1079

28 Word count for Discussion and Conclusion: 1645

29 Word count for Acknowledgements: 65

30

31 Figures: 5 in main text, 3 in supplementary. In colour: Fig. 1, 3, 4, 5, S1, S2, S3

32 Tables: 3 in main text, 10 in supplementary

33 Supporting Information: Methods S1, Notes S1, and Notes S2

34

35 **Summary:**

- 36 • Three hypotheses can explain floral modularity: the attraction-reproduction, the  
37 efficiency, and the developmental hypotheses.
- 38 • In order to test these hypotheses and understand if pollination specialisation and  
39 pollination syndrome influence floral modularity, we focussed on the genus *Erica*: we  
40 gathered 3D data from flowers of species with diverse pollination syndromes via  
41 Computed Tomography, and analysed their shape via geometric morphometrics. In  
42 order to provide an evolutionary framework for our results we tested the evolutionary  
43 mode of floral shape, size, and integration under pollination syndrome regimes, and -  
44 for the first time- reconstructed the high-dimensional floral shape of their most recent  
45 common ancestor.
- 46 • We demonstrate, for the first time, that the modularity of generalist flowers depends  
47 on development and that of specialists is linked to efficiency: in bird syndrome flower,  
48 efficiency modules were associated with pollen deposition and receipt, whereas in  
49 long-proboscid fly syndrome, they were associated with restricting the access to the  
50 floral reward. Only shape PC1 showed selection towards multiple optima, suggesting  
51 that PC1 was co-opted by evolution to adapt flowers to novel pollinators. Whole floral  
52 shape followed an OU model of evolution, and demonstrated relatively late  
53 differentiation.
- 54 • Flower shape modularity thus crucially depends on pollinator specialisation and class.

55  
56 **Keywords:** developmental modularity, efficiency, flower shape, integration, modularity,  
57 pollination syndrome, spandrel.

58 **Introduction:**

59 From the bacterial flagellum (McAdams *et al.*, 2004) to the skull shape of dinosaurs (Fabbri *et*  
60 *al.*, 2017), modular organisation pervades life's phenotype (Wagner *et al.*, 2007). Modules are  
61 subsets of traits that are integrated (i.e. they tend to vary in a coordinated manner) that vary  
62 relatively independently from other such subsets (Klingenberg, 2014). Relative independence  
63 of modules allows for evolutionary tinkering to take place in one module without much  
64 affecting the other (Alon, 2003; Kirsten & Hogeweg, 2011). Modular organisation is thus not  
65 only a key feature of the structural complexity of life, but also a key feature for its  
66 evolvability (Wagner *et al.*, 2007). Theophrastus' observation, twenty three centuries ago, that  
67 "repetition is of the essence of plants" (Theophrastus & Hort, 1916) is underlain by plants'  
68 non-conformity to Weissman's doctrine of separation of soma and germ (Weismann, 1892):  
69 the indefinite developmental totipotency of meristematic plant cells allows for the modular  
70 construction of plants by continuous organogenesis and the repeated production of  
71 homologous structures (Herrera, 2009). However, despite the fundamentally modular  
72 structure of plants (see Ottaviani *et al.* 2017 and references therein), historically, most studies  
73 of modularity have, and still are, focussed on animals (Klingenberg, 2014; Esteve-Altava,  
74 2017)(see Notes S1). In her seminal work, Raissa Berg hypothesised that the variation of  
75 traits in specialised flowers is largely uncorrelated with that of vegetative traits (Berg, 1960),  
76 i.e. that vegetative and reproductive traits form independent modules, which are themselves  
77 highly integrated (Wagner & Altenberg, 1996). Because different floral traits can experience  
78 different selection pressures, Berg's hypothesis can be expanded to include modules of traits  
79 within the flower (Ordano *et al.*, 2008; Diggle, 2014; Armbruster & Wege, 2018).  
80 Accordingly, the following explicit hypotheses of flower modularity have been advanced. The  
81 first hypothesis is the *attraction-reproduction modularity hypothesis*; this hypothesis proposes  
82 that flowers are divided into a module of attraction comprising the petals and the sepals, and a  
83 module of reproduction comprising the stamens and the carpels (Esteve-Altava, 2017), see  
84 Fig. 1a. The second general hypothesis is the *efficiency modularity hypothesis*, which  
85 proposes that flowers are divided into a module efficiency that comprises parts from different  
86 organs that effect reproduction (constriction of floral tube, pollen sacs of the stamens, stigma  
87 of the carpels, etc.), and a module of attraction (e.g. showy part of petals)(Diggle, 2014). This  
88 hypothesis has been supported by multiple studies (Herrera, 2001; Fenster *et al.*, 2004;  
89 Pigliucci & Preston, 2004; Carvallo & Medel, 2005; Pérez *et al.*, 2007; Bissell & Diggle,  
90 2008; Ordano *et al.*, 2008; Bissell & Diggle, 2010; Fornoni *et al.*, 2015; Heywood *et al.*,  
91 2017; Armbruster & Wege, 2018). *Efficiency hypotheses* can comprise modules of pollen

92 deposition and receipt (see efficiency 1 in Fig. **1b**), or modules involving putative pollinator  
93 filters such as corolla aperture (see efficiency 2 in Fig. **1c**).

94 The abovementioned two hypotheses fail to incorporate the specificities of flowers and their  
95 fundamental difference from animal structures. Modules in animals are typically searched for  
96 on different parts of the same organ, such as the skull (e.g. (Drake & Klingenberg, 2010;  
97 Bardua *et al.*, 2019)), the jaw (e.g. (Hulsey *et al.*, 2006)), or the wing (e.g. (Klingenberg *et al.*,  
98 2010; Chazot *et al.*, 2016)), whereas flowers are complexes of fundamentally different organs  
99 performing fundamentally different functions, such as protection from predators (i.e. sepals),  
100 sexual attraction (i.e. petals), male reproduction (i.e. stamens), and female reproduction (i.e.  
101 carpels). Moreover, despite their current functional association, these organs have (mostly)  
102 evolved from different progenitors and most likely without functional association for ca. 125  
103 million years, from the origin of seed plants to that of flowering plants (Morris *et al.*, 2018).  
104 We thus propose a third explicit hypothesis of modularity in flowers: *the developmental*  
105 *modularity hypothesis* proposes that floral modularity is dominated by developmental factors,  
106 i.e. that each organ class (sepal, petal, stamen, and carpel) forms its own module (see Fig. **1d**).  
107 The converse of floral modularity, the tendency of groups of features to be independent from  
108 each other, is whole-flower integration, the tendency for all the features of the flower to co-  
109 vary. Whole-flower integration level has been hypothesised to vary according to pollination  
110 system (see below).

111 Flowers are pollinated by organisms that differ greatly in their morphology and sensory  
112 systems (see e.g. (Kelber & Jacobs, 2016)). This has led to convergences in the floral  
113 morphology of species pollinated by the same group(s) of animals, as described in the  
114 pollination syndrome hypothesis (Vogel, 1954; Grant & Grant, 1965; Stebbins, 1970;  
115 Johnson, 2006). Syndromes can be divided into specialised syndromes (pollination by one  
116 group of pollinators), and generalised syndromes (pollination by several groups of  
117 pollinators). In flowers with specialised syndromes, we expect to observe support for different  
118 versions of the *efficiency modularity* (see, e.g. (Diggle, 2014)), depending on pollinator class.  
119 In generalist flowers, however three main hypotheses have been advanced to explain how  
120 pollinators affect floral shape (Aigner, 2001; Sahli & Conner, 2011; Joly *et al.*, 2018), each of  
121 which would lead to different floral modules. (1) The “trade-off” hypothesis (Aigner, 2001;  
122 Aigner, 2006; Sahli & Conner, 2011) suggests that a change in trait that increases the fitness  
123 contribution of one pollinator will decrease the fitness of another. This model predicts that  
124 selection by multiple pollinators in multiple directions would cancel each other out, resulting  
125 in weak or absent *efficiency modularity*, in which case *developmental modularity* should be

126 observed instead. (2) The “trait specialisation” hypothesis (Sahli & Conner, 2011) proposes  
127 that individual traits are under selection by a subset of pollinators, resulting in flowers that  
128 possess different traits adapted to different pollinators (which predicts several, well-defined  
129 *efficiency modules*). (3) The “common shape” hypothesis (Sahli & Conner, 2011) implies that  
130 the different pollinators all select for a common shape, which also predicts the existence of  
131 *efficiency modules*.

132 Specialisation and pollinator groups have been hypothesised and shown to also influence  
133 whole-flower integration (hereafter only referred to as “integration”). That flowers are highly  
134 integrated organ complexes has become a paradigm among floral biologists (Stebbins, 1950;  
135 Faegri & Van Der Pijl, 1966; Stebbins, 1970; Ordano *et al.*, 2008), as is the hypothesis that  
136 specialised flowers are more highly integrated than generalist flowers because specialised  
137 pollination is expected to drive the evolution of precise, highly coordinated (integrated) floral  
138 traits (Armbruster *et al.*, 1999; Pérez *et al.*, 2007; Rosas-Guerrero *et al.*, 2011; Ellis *et al.*,  
139 2014; Gomez *et al.*, 2014; Gomez *et al.*, 2016). Support for this hypothesis has been provided  
140 (Meng *et al.*, 2008; Rosas-Guerrero *et al.*, 2011; Gomez *et al.*, 2014); however, support for  
141 the opposite hypothesis has unexpectedly also been provided (Armbruster *et al.*, 1999;  
142 Edwards & Weinig, 2011; Joly *et al.*, 2018). Moreover, the group of pollinators possibly also  
143 determines the magnitude of integration of the flowers (Pérez-Barrales *et al.*, 2007; Gomez *et*  
144 *al.*, 2014; Pérez-Barrales *et al.*, 2014; González *et al.*, 2015).

145 Natural selection is an optimising mechanism that increases the accuracy of complex traits,  
146 increasing their precision and decreasing their variation (Bell, 1997; Hansen *et al.*, 2006;  
147 Gomez *et al.*, 2016). In specialist flowers, floral shape and size should show evidence of  
148 stabilising selection around an optimal shape and size adapted to its pollinator, whereas in  
149 generalists, the trade-off hypothesis predicts relaxed selection constraints (Johnson & Steiner,  
150 2000), and both the trait specialisation hypothesis and the common shape hypothesis (Sahli &  
151 Conner, 2011) predict selection similar to that present in specialists. Therefore, from a macro-  
152 evolutionary perspective, if floral shape, size, and integration are affected by pollination  
153 syndromes, we would expect that within a lineage where a number  $N$  of pollination  
154 syndromes evolved repeatedly, the evolution of these floral parameters follows a natural  
155 selection model such as an Orstein-Uhlenbeck (OU) process with  $N$  optima. Alternatively, if  
156 floral shape, size, and integration are not affected by pollination syndromes, we would expect  
157 that the evolution of these floral parameters follows a drift-like model such as the Brownian  
158 Motion (BM) process instead.

159 To our knowledge, no study has yet tested if floral modules change with pollinator groups; if  
160 modularity type changes with specialisation, and what the process of evolution of 3D shape,  
161 size, and integration in a system with convergent evolution of pollinator systems is. To  
162 answer these questions and test these hypotheses requires a study system in which convergent  
163 evolution of specialist pollination systems occurred, and that also contains species with  
164 generalist pollination; such a system should also possess a constant floral bauplan in order to  
165 rigorously homologise structures. *Erica* is such a system: it is a large genus of ca. 800 species  
166 mostly distributed in South Africa (Pirie *et al.*, 2016). Within the many South African  
167 members of the genus, evolution of pollination via birds and long-proboscid flies (LPF) has  
168 possibly repeatedly taken place (Pirie *et al.*, 2011), whereas generalist pollination syndrome  
169 has been found to be prevalent in European species (see Table 1). Moreover, the flowers of  
170 *Erica* have consistently the same, 4-merous bauplan with mostly 8 stamens (Stevens *et al.*,  
171 2004). *Erica* is thus the ideal system to test the effects of pollinator shifts on floral  
172 modularity.

173 In order to test the abovementioned modularity and macro-evolutionary hypotheses, we  
174 generated 3D models of *Erica* flowers, the shape of which we digitised using geometric  
175 morphometric landmarks. We then used this shape dataset to test our different modularity  
176 hypotheses in *Erica* flowers (attraction-reproduction, developmental, and efficiency 1 and 2)  
177 in flowers with different pollination syndromes. We used phylogenetic reconstructions to test  
178 if floral parameters (shape, size, and integration) evolved under selection driven by  
179 pollination syndromes or randomly. We thus aim to understand: (1) The relative importance  
180 of the components of floral shape and size in predicting pollination syndromes (2) How floral  
181 shape modularity changes with pollination syndromes and floral specialisation (3) The  
182 possible evolutionary patterns of floral shape in *Erica* (4) The relative roles of natural  
183 selection models (i.e. Ornstein-Uhlenbeck) and drift-like models (i.e. Brownian motion) in  
184 explaining the evolution of floral shape, size, and integration in respect to pollination  
185 syndromes.

186

## 187 **Materials and Methods:**

### 188 *Plant material*

189 We analysed ca. 10 flowers each from a single genotype representing nineteen species of  
190 *Erica* from the collections of the greenhouses of the Belvedere Garden (Austrian Federal  
191 Gardens). We selected species based on their diversity in pollination syndrome (generalist,  
192 bird, long-proboscid flies, and wind) and broadly representative phylogenetic position.

193 Although limited, our selection contains both older European lineages and species from the  
194 more recently diversified and species rich South-Western Cape Clade as defined by (Pirie *et*  
195 *al.*, 2011; Pirie *et al.*, 2016), see Method S1 and Table 1 for details.

#### 196 *X-ray tomography*

197 Flowers were contrasted, mounted, and scanned according to (Staedler *et al.*, 2013). See  
198 Methods S1 and Table S1 for details.

#### 199 *3D-landmarking & Geometric Morphometrics*

200 Geometric morphometric landmarking was carried out on isosurface models in AMIRA.  
201 Thirty-three homologous landmarks were placed on each flower (see Fig. **2a-c**, Table S2).  
202 Landmark coordinates were exported as csv-files, concatenated, and imported in MorphoJ  
203 1.06d (Klingenberg, 2011). Procrustes fit, and calculation of the covariance matrix, Principal  
204 Component Analysis (PCA), modularity analyses, and allometric regressions were performed  
205 in MorphoJ. See Methods S1 for details.

#### 206 *Pollination syndrome prediction*

207 Given the scarcity of direct evidence for pollinators of particular *Erica* species, we relied on  
208 visitor data, combining published observations of populations in the wild (eight species, see  
209 table 1) with our own of individuals in cultivation (one species, see table 1), to assess  
210 pollination syndrome. Species with flowers observed to be visited by birds and long-  
211 proboscid flies (LPF) (see Table 1) were classified into the specialised bird and LPF  
212 syndrome. Wind pollination was documented in one species, which was then classified into  
213 the wind syndrome. Species with flowers that were observed to be visited by several groups  
214 of insects that could pollinate the flowers were classified into the generalist syndrome. Using  
215 these observations, we identified the floral shape and size components discriminating among  
216 pollination types using a random forests (RF) classification algorithm (Breiman, 2001). See  
217 Methods S1 for details.

#### 218 *Modularity analysis*

219 We used the RV coefficient method of Klingenberg (Klingenberg, 2009), implemented in  
220 MorphoJ (Klingenberg, 2011) to test our modularity hypotheses. The methodology uses the  
221 RV coefficient, a multivariate generalisation of the squared Pearson coefficient (Escoufier,  
222 1973), as a measure of independence of subsets of the landmark data; it identifies sets of  
223 landmarks that group together and are likely to function as evolutionary entities. We carried  
224 out modularity analyses on subsets of our data pooled by syndrome (variation pooled by  
225 species). We then calculated the correlation between the shape variation of the sets of  
226 landmarks (RV coefficient) of the partitions corresponding to the *attraction-reproduction*, the

227 developmental, and two different efficiency hypotheses (Fig. **1a-d**, table S2) and compared it  
228 with that of 100 million random partitions. The proportion of partitions with lower RV  
229 coefficient than the tested partition (i.e. partitions showing higher among-set independence)  
230 was used as a measure of support for that partition, the lower the proportion, the higher the  
231 support (Young, 2006; Gomez *et al.*, 2014).

#### 232 *Estimation of size, and integration*

233 Size was measured as species-level average in centroid size, as implemented in MorphoJ.  
234 Integration coefficients were calculated at the species level as shape PCA eigenvalue variance  
235 scaled by the total variance and number of variables (Klingenberg & Marugan-Lobon, 2013)  
236 as implemented in MorphoJ (see Table S3).

#### 237 *Phylogenetic inference*

238 Phylogenetic relationships were inferred using DNA sequences from two loci of the chloroplast  
239 genome (*trnLF-ndhJ* and *trnT-L* intergenic spacers) and one loci of the nuclear genome (internal  
240 transcribed spacer (ITS)) from 61 pre-existing sequences of 19 *Erica* species as ingroup and  
241 *Calluna vulgaris* and *Daboecia cantabrica* as outgroups (see Table S4 for source of the sequences  
242 and their GenBank numbers). Divergence time analyses were carried out within a Bayesian  
243 framework by employing an uncorrelated lognormal relaxed clock model in BEAST version 1.8.4  
244 (Drummond *et al.*, 2012) by applying secondary calibration via using the two previously published  
245 nodal ages (Pirie *et al.*, 2016). See Methods S1 for details.

#### 246 *Ancestral Character State Reconstruction*

247 We used a pruned phylogeny (i.e. removing the outgroup) for the 19 *Erica* species included in  
248 this study to estimate the probability of the pollination strategy states for all nodes of the  
249 phylogeny. As a demonstration of the potential of this approach, we estimated ancestral states  
250 of pollination syndromes using Maximum Likelihood (ML) (Harmon *et al.*, 2010; Revell,  
251 2012) and empirical Bayes (Revell, 2012) methods. See Methods S1 and Table S5 for details.

#### 252 *Models of floral trait evolution (unidimensional and high-dimensional)*

253 We applied a penalised likelihood approach to high-dimensional phenotypic dataset of flower  
254 shapes of 19 *Erica* species to estimate the fit of three different evolutionary models; Brownian  
255 Motion (BM), Ornstein–Uhlenbeck (OU), and Early Burst (EB) in order to better understand  
256 the process of floral-shape evolution in the clade (Clavel *et al.*, 2018). The analysis was  
257 carried out under the *fit\_t\_pl* function (RPANDA)(Morlon *et al.*, 2016), and the best fit of the  
258 abovementioned three models was assessed using the Generalised Information Criterion  
259 (GIC) with the *GIC* function (mvmorph)(Clavel *et al.*, 2015). Finally, we employed the  
260 parameters derived from the evolutionary model that best fitted our high-dimensional data to



261 obtain floral shape reconstructions through time, as implemented in the function *ancestral* and  
262 *phyl.pca\_pl* (RPANDA)(Morlon et al., 2016). To visualise 3D models of the reconstructed  
263 ancestral floral shapes at selected nodes, a 3D surface model of a flower of *Erica hirtiflora*  
264 (lying approximately in the middle of the PC1 x PC2 space plot) was warped to each target  
265 ancestral shape. This was carried out by aligning the reconstructed ancestral shape at the  
266 selected nodes and the landmark data of the chosen model (*E. hirtiflora*) using a thin plate  
267 spline (TPS) interpolation (Wiley et al., 2005), using the function *tps3d* (Morpho)(Schlager,  
268 2017) and the function *extractShape* (Clavel et al., 2018).

269 We fitted a series of likelihood models (i.e. Brownian motion and Ornstein-Uhlenbeck  
270 models) to understand how changes in pollination syndromes influence the evolution of  
271 various continuous unidimensional floral traits of *Erica* (i.e. PC1, PC2, PC3, PC4, PC5,  
272 centroid size, and integration). The best fitting model was determined comparing AICc,  
273  $\Delta$ AICc, and AICc weights among the models. All analyses were implemented using the R  
274 package OUwie (Beaulieu et al., 2012). See Methods S1 for details.

275

## 276 **Results:**

### 277 *Pollination syndromes prediction*

278 The floral features used in the Random Forest (RF) classification algorithm successfully  
279 classified species into pollinator classes. The most important variable for pollinator prediction  
280 was tube length (Fig. **S1a**, Tables S6, S7). The next 15 most important variables were  
281 landmarks describing the widest and narrowest positions of the corolla, the ovary/style  
282 transition, the meeting point of petal lobes, and the position of sepal tips (Fig. **S1a**, Table S6).  
283 For 9 of the 10 predicted species, all flowers were assigned to the same pollination syndrome  
284 (Table S8). *E. georgica* was classified either as generalist, bird, LPF, or wind syndrome with  
285 varying support (Table S8). We assigned *E. georgica* to the LPF syndrome because the tube  
286 length of all these flowers corresponds to that syndrome (Fig. **S1b**), and because the shape of  
287 the flower and its morphology also corresponds to that syndrome, as defined for *Erica*  
288 (Rebelo et al., 1985). Our RF classifications are in agreement with (Rebelo et al., 1985).

### 289 *Flower shape*

290 Together, principal component (PC) 1 and PC2 account for 62 % of total shape variation  
291 (38.9% for PC1 and 22.1% for PC2). The main distortion along the PC1 is a constriction,  
292 elongation and slight curving of the corolla tube. Flowers along PC2 are mainly differentiated  
293 by the proximal to medial position of the inflation of the corolla. This varies from globose-  
294 urceolate to tubular-urceolate flowers along PC1 and cylindrical to ovoid floral shape along

295 PC2. The PC axis-related distortion along PC1 and 2 is visualised by an exemplary shape  
296 distortion of a flower of *E. hirtiflora* (Fig. 3). The spreading along the two axes did not reflect  
297 the phylogeny in separating clades defined by (Pirie *et al.*, 2016) (but see the *Evolution*  
298 section below). The convergent evolution of bird and LPF syndrome in our dataset display  
299 different patterns: the unrelated LPF syndrome flowers are tightly clustered in the  
300 morphospace whereas the bird syndrome flowers are in two clusters.

### 301 *Modularity*

302 In flowers with generalist syndrome, the best supported modularity hypothesis was the  
303 *developmental* hypothesis (see Table 2, Fig. 4a, Fig. S2a-d), although the *efficiency*  
304 hypotheses 1 and 2 received -weaker- support (see Table 2). In flowers with bird syndrome,  
305 the best supported modularity hypothesis was the *efficiency* 1 hypothesis (see Table 2, Fig.  
306 4b, Fig. S2e-h), although the *developmental* hypothesis received –slightly weaker- support  
307 (see Table 2). In flowers with LPF syndrome, the best supported modularity hypothesis was  
308 the *efficiency* 2 hypothesis (see Table 2, Fig. 4c, Fig. S2i-l), although the *efficiency* hypothesis  
309 1 received –weaker- support (see Table 2). In flowers with wind syndrome, the best supported  
310 modularity hypothesis was the *developmental* hypothesis (see Table 2, Fig. 4d, Fig. S2m-p).  
311 The *attraction-reproduction* hypothesis was not strongly supported for any pollination  
312 syndrome (See table 2).

### 313 *Allometry*

314 The symmetric component of the entire dataset exhibited significant but weak allometry:  
315 1.17% & ( $P = 0.001$ ; see Fig. S3a). If the species are split by pollination syndrome, the  
316 proportion of variation explained by allometry (pooled by species) differs according to  
317 syndrome (see Notes S3). For the sake of brevity, only the allometric deformation in  
318 syndromes for which it is both strong ( $> 10\%$  predicted shape) and significant ( $P < 0.05$ ) will  
319 be discussed here (i.e. long-proboscid flies and wind syndromes). In the flowers with LPF  
320 syndrome, large flowers tend to have a more flask-shaped corolla, and the landmarks on the  
321 mouth of the corolla are closer to the floral axis (Fig. S3b). In the flowers with wind  
322 syndrome, large flowers tend to have corolla lobes more open and stamens more exerted (Fig.  
323 S3c).

### 324 *Ancestral Character States Reconstruction*

325 Ancestral state reconstruction for pollination syndromes (Fig. 5a) suggests that the generalist  
326 pollination syndrome is the possible most recent common ancestral (MRCA) state in *Erica*.  
327 Within our sampled species the bird pollination syndrome, as well as the LPF syndrome  
328 evolved twice independently.

329 *Models of floral trait evolution*

330 Under the penalised likelihood approach, the best fitting model to the evolution of the highly-  
331 dimensional whole floral shape in *Erica* was the Ornstein–Uhlenbeck model (OU; lowest  
332 GIC; Table S9), which assumes evolution towards an optimal floral shape mean as would be  
333 expected under selection.

334 The MRCA floral shape of *Erica* most likely displays short and urceolate flowers, as expected  
335 for flowers with generalist syndrome (Fig. **5b**, node 1). The reconstructed evolutionary  
336 trajectory (under the best fitted model of OU) displays likely late differentiations in flower  
337 shape, with most differentiation possibly occurring at the most recent internal nodes of the  
338 tree (Fig. **5b**, nodes 3, 7, 8, and 9). In both reconstructed ancestors of convergent evolution of  
339 LPF syndrome, the most recent internal nodes (Fig. **5b**, nodes 9 and 11) likely display  
340 differentiation but this differentiation is weak compared to that of terminal nodes (Fig. **5b**,  
341 flowers of *E. ventricosa*, and *E. georgica*).

342 The results of the fitting of five models (BM<sub>1</sub>, BM<sub>S</sub>, OU<sub>1</sub>, OU<sub>M</sub>, and OU<sub>MV</sub>) on quantitative  
343 floral trait evolution (shape PC1-5, size, and integration) under the four pollination-syndrome  
344 regimes are summarised in Table 3. The Hessian matrix of one model (i.e. OU<sub>MV</sub>) displayed a  
345 negative eigenvalue for PC3, PC4, integration, and centroid size, which means that this model  
346 was too complex for the information contained in these data and it was excluded from the  
347 analyses. Different evolutionary scenarios yielded variable AICc distributions,  $\Delta$ AICc, and  
348 AICc weights (see Table 3). The evolution of floral shape along PC1 and centroid size of  
349 flowers were found to best fit an OU<sub>M</sub> model (see Table 3). This evolutionary model suggests  
350 selection around four different optimal values ( $\theta$ ), one per pollination syndrome (see Table  
351 S10). This suggests that PC1 and centroid size have different evolutionary means for each of  
352 the four pollination syndrome regimes and that there is an evolutionary force that maintains  
353 PC1 and size closer to this evolutionary mean than would be expected under a BM model.

354 The evolution of floral shape along PC2, PC5, and floral integration were found to best fit an  
355 OU<sub>1</sub> model (see Table 3). This result suggests that there is no difference between the four  
356 pollination syndromes, and that PC2, PC5, and integration each evolve towards a single one  
357 optimum ( $\theta$ ) across all *Erica* species (Table S10), indicating a lack of evidence for different  
358 constraints by the four pollination regimes. The best-fitted model for the evolution of floral  
359 shape along PC3 and PC4 was a BM<sub>1</sub> model (see Table 3), where there is no difference  
360 between the pollination syndromes, and these floral variables evolve according to a random  
361 walk process.

362

363 **Discussion:**

364 *Modularity*

365 In flowers with the generalist syndrome, our observation of strong support for the  
366 *developmental modularity* hypothesis supports the “trade-off” hypothesis of evolution of  
367 generalist flowers (which implies the absence of efficiency modules), and invalidates both the  
368 “trait specialisation” hypothesis and the “common shape” hypothesis (which both imply the  
369 evolution of efficiency modules). This contrasts with flowers with specialised syndromes  
370 (bird and LPF syndromes) which display support for (different) *efficiency* hypotheses. Similar  
371 patterns of modularity to that supported in flowers with bird syndrome (attraction-receipt-  
372 deposition) have been found across angiosperms: in a reanalysis of existing data, the least  
373 variable attributes of flowers were found to be those potentially affecting the mechanical fit  
374 between flower and pollinator (Cresswell, 1998). The results of (Cresswell, 1998) suggest  
375 independence, but do not test for the latter; such a test was carried out only in few studies  
376 such as for species of *Nicotiana* (Solanaceae) where such similar efficiency modules (lengths  
377 of the floral tube, stamens and gynoecium) were evidenced (Herrera *et al.*, 2002; Bissell &  
378 Diggle, 2010).

379 In the flowers with LFP syndrome, the set of landmarks of the “corolla aperture” does not  
380 include any reproductive organs; the function of this set is thus most likely not directly pollen  
381 deposition or receipt. In the Cape, flowers with LPF syndrome typically have very narrow  
382 floral tubes (Goldblatt & Manning, 2000); *Erica* flowers with this syndrome, however, do not  
383 always have narrow tubes, but do have a narrow corolla apertures (see Fig. **4c**) (Rebelo *et al.*,  
384 1985). This corolla aperture likely plays a role in restricting access to the floral rewards to  
385 certain classes of pollinators. This interpretation is supported by the allometric shape  
386 deformation (how shape changes with size) in LPF syndrome flowers: in shape, in larger  
387 flowers the corolla aperture is, relative to the rest of the flower, narrower, but in size, the  
388 corolla aperture stays about the same size in smaller and in larger flowers (Fig. **S3b**). Because  
389 of its putative function, we propose to refer to the set of landmarks on the corolla aperture as a  
390 “restriction module”. Similar structures were found to preclude visits from bats in bird-  
391 pollinated *Burmeistera* (Campanulaceae), and to vary much less than the rest of the flower  
392 (Muchhala, 2006), suggesting they constitute an independent module. Moreover, this  
393 restriction module also contains the petal tips (Fig. **4c**), that do not actively contribute to  
394 limiting access to the floral reward; their small size relative to the rest of the corolla also  
395 precludes a major role in pollinator attraction. Their presence in the restriction module is  
396 therefore most likely non-adaptive and only due to their developmental proximity to the

397 corolla aperture. Their presence within the restriction module is therefore most likely a  
398 spandrel *sensu* Gould and Lewontin (Gould & Lewontin, 1979). If it were feasible, a denser  
399 sampling of landmarks across the flowers would probably uncover more of such structures  
400 grouping in shape modules owing to their developmental proximity and not their function.  
401 In flowers with wind syndrome, support for the developmental hypothesis suggests that the  
402 shape of the different organ classes is independent from each other. This could be due to the  
403 fact that (1) wind pollinated flowers probably do not require across-organ class modules (for  
404 pollen receipt), and (2) that our data is dominated by developmental shape changes.

405 Modelling studies in grasses that have shown that pollen deposition overwhelmingly relies  
406 only on direct impact on the stigma and not on air flows generated by the rest of the flower  
407 (Cresswell *et al.*, 2010), which suggests that there is no selection pressure for the rest of the  
408 flowers to form pollen receipt modules (as in *efficiency* hypothesis 1). The strong but weakly  
409 significant allometry reflects typical differences in flower shape related to differences in  
410 anthesis stage: larger (older) flowers have more open petals and more exerted stamens than  
411 smaller (younger) flowers (Fig. **S3c**); these changes would also cause organs classes to each  
412 display shape variation along their own developmental axis and be independent from each  
413 other. This notwithstanding, any interpretation is tentative given our limited sampling of this  
414 syndrome.

#### 415 *Floral shape evolution*

416 The radiation of *Erica* in the Cape is the greatest known to have occurred there and one of the  
417 greatest in recent plant biological history (Pirie *et al.*, 2016). Analyses confirmed the “hotbed”  
418 hypothesis in the genus, i.e. that the radiation of *Erica* was due to increased speciation rates,  
419 and showed an overall recent slowing down of speciation rates (although they do remain high  
420 in the former South Western clade (Pirie *et al.*, 2016)). Shifts in multiple local-scale  
421 ecological gradients, and repeated shift in pollinator preferences appear to have taken place  
422 (Linder *et al.*, 2010; Pirie *et al.*, 2016). Such a radiation fits Simpson’s adaptive zone model in  
423 which similar niches become ecologically available to a lineage, free from competitors  
424 (Simpson, 1944): when a lineage first enters these zones, phenotypical evolution should at  
425 first be fast, but as ecological niches are filled, the rate of phenotypical evolution should then  
426 slow down (Simpson, 1944; Schluter, 2000; Losos & Miles, 2002; Harmon *et al.*, 2010). In  
427 such a radiation, one would expect to recover an EB mode of phenotypical evolution (Harmon  
428 *et al.*, 2010). However, our analysis of the highly-dimensional morphometric dataset of flower  
429 shape recovered as the best fit an OU model of evolution (Table S9), a model considered to  
430 better represent the importance of selection. This is further supported by our ancestral floral

431 shape reconstruction (Fig. **5b**), which indicates a pattern of greater phenotypical variation at  
432 the most recent internal nodes of the tree (Figs. 5a & b, nodes 3, 8, 9, 11), a pattern consistent  
433 with pollinator-driven selection (OU model (Harmon *et al.*, 2010)). Our finding of strong  
434 evolutionary changes over short time scales concurs with previous findings from diverse data  
435 sources (Gingerich, 1983; Lynch, 1990; Hendry & Kinnison, 1999; Roopnarine, 2003; Estes  
436 & Arnold, 2007; Harmon *et al.*, 2010). This is furthermore strongly supported by our analyses  
437 of the evolutionary model of PC1 and centroid size under different regimes (i.e. pollination  
438 syndrome) which recovered as best fit an  $OU_M$  model of evolution (selection towards  
439 different optima; Tables 3, S11), strongly indicating that pollinators have indeed driven the  
440 evolution of floral shape (see below), therefore supporting the a strong role for pollinator-  
441 driven speciation in *Erica* (Pirie *et al.*, 2011). PC1 corresponds to a shape change from open  
442 bell shaped flowers to more elongated, tubular flowers, generating, for the same size, longer  
443 tubes and strongly affecting the landmarks on the narrowest and broadest parts of the corolla  
444 (see Fig. **3**). These landmarks, together with tube length, were shown by our random forest  
445 analyses to be especially important in predicting pollination syndromes (see Table S6). PC1  
446 therefore involves a shape change that is especially relevant for the generation of the different  
447 floral shapes of the different pollination syndromes. Variation in PC1 was thus most likely co-  
448 opted by evolution to generate the different syndrome morphologies, and ended up  
449 encapsulating almost 40% of shape variance (Table S10). Similarly, centroid size is strongly  
450 correlated with tube length ( $R^2 = 0.96$ ;  $P = 2.2E-16$ ), the variable we demonstrate to play the  
451 strongest role in predicting the different syndromes (Fig. **S1a**, Table S6). Other PCs probably  
452 do not generate variation for which divergent selection on syndromes was present (or strong  
453 enough to be identified with our limited sampling), and therefore follow either a single  
454 optimum ( $OU_1$ ) or a random model ( $BM_1$ ) of evolution (Tables 3, S11).  
455 Our result, that integration follows an  $OU_1$  model of evolution (selection with a single  
456 optimum; Tables 3, S11), does not support increased floral integration in specialist compared  
457 to generalist flowers. Our results also contrast with the results of Gomez *et al.* (2014) who  
458 recovered a BM model of evolution for floral integration (Gomez *et al.*, 2014). However,  
459 Gomez *et al.* (2014) included only landmarks placed on the petals (in 2D), whereas our study  
460 includes reproductive organs (in 3D). Because, efficiency modularity (including reproductive  
461 parts) has been shown to be stronger than attraction modularity (including the petals only)  
462 (Rosas-Guerrero *et al.*, 2011), our study likely includes a signal that is not present in that of  
463 Gomez *et al.* (2014). Evolution of whole-flower integration towards a single optimum suggest  
464 that evolution of increased integration in functional part of the flowers may come at the cost

465 of lower integration with other parts of the flowers, leading to evolution towards a single  
466 optimal value in generalised and specialised systems. Our findings thus do not support  
467 changes in integration as a whole, but strongly support changes in its structure, an observation  
468 congruent with (Ordano *et al.*, 2008).

469

470 **Conclusion:**

471 Our results illustrate for the first time the potential of 3D datasets (that include the  
472 reproductive organs of flowers) together with geometric morphometrics to uncover the  
473 modularity of the highly dimensional shape of flowers as a function of pollinator syndrome,  
474 and together with a novel penalised likelihood framework (Clavel *et al.*, 2018) also for the  
475 first time to test the fits of evolutionary models to the macro-evolution of high-dimensional  
476 flower shape and reconstruct its trajectory.

477 Simulations of biological evolution have demonstrated that modularity is favoured within  
478 environments where selection changes over time in such a way that each new selective  
479 pressure shares some of the aspects of the previous selective pressure (Kashtan & Alon, 2005;  
480 Kashtan *et al.*, 2007). It has been shown that within a pollination syndrome, selection on floral  
481 traits can change from year to year due to fluctuations in pollinator abundance (Herrera, CM,  
482 1988; Campbell, 1989; Campbell *et al.*, 1991). We thus speculate that syndromes are such a  
483 changing environment, that evolution of a new syndrome is the equivalent to a change of  
484 environment, necessitating the evolution of a new modular organisation (although overall  
485 floral integration need not change), and finally that fluctuations in pollinator abundance  
486 (within a syndrome) play a role in the emergence of flower modularity.

487

488 **Acknowledgements:**

489 The authors wish to thank the Belvedere garden for granting access to the material (special  
490 thanks to the head gardener, Mr. M. Knaack). We would like to also thank the company  
491 Stadler Fleurs for donating material for this study. We also thank Julien Clavel for his help  
492 with the analyses, and Michael Pirie for his valuable comments on a previous version of the  
493 manuscript.

494

495

496 **Author contributions:**

497 YS and MvB designed the project, YS and MvB collected the material, DR and AB collected  
498 the data and ran preliminary analyses, MC carried out the random forest analyses, SM and MS  
499 carried out the phylogenetic analyses, SM carried out the trait evolution analyses, YS and CK  
500 carried out the geometric morphometric analyses, SM designed the manuscript, YS and SM  
501 wrote the manuscript. DR and AB contributed equally.



502 **Tables:**

503 **Table 1.** Sampling, systematic syndrome, observed (a, b, e-n) or predicted (in the literature: c,  
504 d, or via machine learning: RF = Random Forests), and number of flowers scanned.

| <b>Species</b>                           | <b>Clade<sup>a</sup></b> | <b>Syndrome</b> | <b>Reference</b> | <b>n (flowers)</b> |
|------------------------------------------|--------------------------|-----------------|------------------|--------------------|
| <i>Erica australis</i> L.                | Palaearctic              | gen             | b                | 11                 |
| <i>Erica blandfordia</i> Andrews         | Cape                     | gen             | c, RF            | 11                 |
| <i>Erica bolusiae</i> T. M. Salter       | Cape                     | gen             | c, RF            | 10                 |
| <i>Erica brachialis</i> Salisb.          | Cape                     | bird            | c, j, k          | 14                 |
| <i>Erica capensis</i> T.M. Salter        | Cape                     | gen             | c, n             | 10                 |
| <i>Erica curviflora</i> L.               | Cape                     | bird            | c, RF            | 11                 |
| <i>Erica georgica</i> L. Guthrie & Bolus | Cape                     | lpf             | RF               | 15                 |
| <i>Erica gracilis</i> J.C. Wendl.        | Cape                     | gen             | l                | 10                 |
| <i>Erica hirtiflora</i> Curtis           | Cape                     | gen             | c, m             | 10                 |
| <i>Erica lateralis</i> Willd.            | Cape                     | gen             | c, d, RF         | 10                 |
| <i>Erica leucotrachela</i> H.A. Baker    | Cape                     | bird            | c, RF            | 10                 |
| <i>Erica margaritacea</i> Aiton          | Cape                     | gen             | c, RF            | 13                 |
| <i>Erica melanthera</i> L.               | Cape                     | gen             | c, RF            | 10                 |
| <i>Erica perspicua</i> J.C. Wendl.       | Cape                     | bird            | e, c, g          | 10                 |
| <i>Erica scoparia</i> L.                 | Palaearctic              | wind            | f                | 10                 |
| <i>Erica spiculifolia</i> Salisb.        | Palaearctic              | gen             | RF               | 12                 |
| <i>Erica turgida</i> Salisb.             | Cape                     | gen             | c, RF            | 12                 |
| <i>Erica vagans</i> L.                   | Palaearctic              | gen             | h, i             | 11                 |
| <i>Erica ventricosa</i> Thunb.           | Cape                     | lpf             | c, <b>d</b>      | 9                  |

505 Footnote:

506 Visitor data from literature, websites, and personal observation. gen: insect generalist  
507 pollination syndrome; LPF: long-proboscid fly. a, (Pirie *et al.*, 2016); b, (Gil-López *et al.*,  
508 2014); c, (Rebelo *et al.*, 1985); d, (Rebelo *et al.*, 1984); e, (Heystek *et al.*, 2014); f, (Herrera,  
509 J, 1988); g, (Geerts, 2011); h, (Fern & Fern, 2012); i, (Plants\_Database, 2019); j, (Turner,  
510 2010); k, (Notten, 2012); l, Yannick M. Staedler, pers. obs. on cultivated specimen; m,  
511 (Arendse, 2015); n, (Cullinan *et al.*). RF, syndrome predicted via random forests. c and d,  
512 contain description of syndromes and attribute different *Erica* species to them. \* contains  
513 mention of observation for this species.

514

515 **Table 2.** Modularity tests for the *attraction-reproduction*, *developmental*, and *efficiency 1* and  
 516 2 hypotheses. (Most significant values in bold).

517

| <b>Generalist syndrome</b> |                  |           |                     |
|----------------------------|------------------|-----------|---------------------|
| hypothesis                 | RV of hypothesis | lowest RV | proportion lower RV |
| Attraction/reproduction    | 0.22             | 0.19      | 1.40E-003           |
| <b>Developmental</b>       | 0.12             | 0.11      | <b>2.30E-007</b>    |
| Efficiency 1               | 0.13             | 0.11      | 4.10E-005           |
| Efficiency 2               | 0.16             | 0.14      | 7.33E-006           |

  

| <b>Bird syndrome</b>    |                  |           |                     |
|-------------------------|------------------|-----------|---------------------|
| hypothesis              | RV of hypothesis | lowest RV | proportion lower RV |
| Attraction/reproduction | 0.4              | 0.16      | 3.50E-002           |
| Developmental           | 0.19             | 0.16      | 3.66E-006           |
| <b>Efficiency 1</b>     | 0.15             | 0.14      | <b>3.02E-006</b>    |
| Efficiency 2            | 0.29             | 0.16      | 3.50E-003           |

  

| <b>LPF syndrome</b>     |                  |           |                     |
|-------------------------|------------------|-----------|---------------------|
| hypothesis              | RV of hypothesis | lowest RV | proportion lower RV |
| Attraction/reproduction | 0.39             | 0.3       | 1.80E-002           |
| Developmental           | 0.23             | 0.17      | 8.07E-004           |
| Efficiency 1            | 0.17             | 0.16      | 4.20E-006           |
| <b>Efficiency 2</b>     | 0.23             | 0.22      | <b>5.50E-007</b>    |

  

| <b>Wind syndrome</b>    |                  |           |                     |
|-------------------------|------------------|-----------|---------------------|
| hypothesis              | RV of hypothesis | lowest RV | proportion lower RV |
| Attraction/reproduction | 0.72             | 0.44      | 2.50E-001           |
| <b>Developmental</b>    | 0.43             | 0.32      | <b>1.70E-003</b>    |
| Efficiency 1            | 0.47             | 0.29      | 4.00E-002           |
| Efficiency 2            | 0.54             | 0.34      | 2.60E-002           |

518

519 **Table 3.** Models of quantitative phenotypic trait evolution (PC1-5 of floral shape, size, and  
 520 integration) under the pollination syndrome regime, and their biological interpretation, model  
 521 fit of plausible models for the seven floral variables, indicating AICc (corrected AIC score),  
 522  $\Delta$ AICc, and AICc weight..

523

| variables     | Model      | AICc          | $\Delta$ AICc | AICc weight   | Interpretation of the best model for shape, integration, and size variable evolution                                                                                                                     |
|---------------|------------|---------------|---------------|---------------|----------------------------------------------------------------------------------------------------------------------------------------------------------------------------------------------------------|
| PC1           | BM1        | -6.65         | 7.91          | 0.015         | Evolution of shape along PC1 is constrained; different optima depend on pollination syndromes, which would imply that optimal shape along PC1 has evolved separately for different pollination syndromes |
|               | BMS        | 0.46          | 15.02         | 4.22E-04      |                                                                                                                                                                                                          |
|               | OU1        | -5.5          | 9.01          | 0.008         |                                                                                                                                                                                                          |
|               | <b>OUM</b> | <b>-14.56</b> | <b>0</b>      | <b>0.772</b>  |                                                                                                                                                                                                          |
|               | OUMV       | -11.9         | 2.66          | 0.204         |                                                                                                                                                                                                          |
| PC2           | BM         | -11.31        | 2.11          | 0.232         | Evolution of shape along PC2 is directed toward an optimum without being affected by the pollination syndromes                                                                                           |
|               | BMS        | -4.76         | 8.66          | 0.009         |                                                                                                                                                                                                          |
|               | <b>OU1</b> | <b>-13.42</b> | <b>0</b>      | <b>0.667</b>  |                                                                                                                                                                                                          |
|               | OUM        | -9.44         | 3.98          | 0.091         |                                                                                                                                                                                                          |
|               | OUMV       | -1.27         | 12.16         | 0.002         |                                                                                                                                                                                                          |
| PC3           | <b>BM</b>  | <b>-34.98</b> | <b>0</b>      | <b>0.758</b>  | Evolution of shape along PC3 is random and not affected by the different pollination syndromes                                                                                                           |
|               | BMS        | -26.25        | 8.73          | 0.010         |                                                                                                                                                                                                          |
|               | OU1        | -32.61        | 2.37          | 0.231         |                                                                                                                                                                                                          |
|               | OUM        | -22.69        | 12.29         | 0.002         |                                                                                                                                                                                                          |
| PC4           | <b>BM</b>  | <b>-38.35</b> | <b>0</b>      | <b>0.630</b>  | Evolution of shape along PC4 is random and not affected by the different pollination syndromes                                                                                                           |
|               | BMS        | -30.17        | 8.17          | 0.011         |                                                                                                                                                                                                          |
|               | OU1        | -37.03        | 1.32          | 0.326         |                                                                                                                                                                                                          |
|               | OUM        | -32.5         | 5.85          | 0.034         |                                                                                                                                                                                                          |
| PC5           | BM         | -37.62        | 0.4           | 0.437         | Evolution of shape along PC5 is directed toward an optimum without being affected by the pollination syndromes                                                                                           |
|               | BMS        | -30.49        | 7.52          | 0.012         |                                                                                                                                                                                                          |
|               | <b>OU1</b> | <b>-38.01</b> | <b>0</b>      | <b>0.533</b>  |                                                                                                                                                                                                          |
|               | OUM        | -31.22        | 6.8           | 0.018         |                                                                                                                                                                                                          |
|               | OUMV       | -18.84        | 19.17         | 3.66E-05      |                                                                                                                                                                                                          |
| Integration   | BM         | -47.52        | 1.09          | 0.364         | Evolution of shape integration is directed toward an optimum without being affected by the pollination syndromes                                                                                         |
|               | BMS        | -38.67        | 9.94          | 0.004         |                                                                                                                                                                                                          |
|               | <b>OU1</b> | <b>-48.61</b> | <b>0</b>      | <b>0.6264</b> |                                                                                                                                                                                                          |
|               | OUM        | -39.22        | 9.39          | 0.006         |                                                                                                                                                                                                          |
| Centroid size | BM1        | 160.28        | 23.11         | 9.42E-06      | Evolution of size is constrained; different optima depend on pollination syndromes, which would imply that optimal size has evolved separately for different pollination syndromes                       |
|               | BMS        | 144.98        | 7.81          | 0.020         |                                                                                                                                                                                                          |
|               | OU1        | 161.09        | 23.91         | 6.29E-06      |                                                                                                                                                                                                          |
|               | <b>OUM</b> | <b>137.17</b> | <b>0</b>      | <b>0.98</b>   |                                                                                                                                                                                                          |

524  
 525

526 **References**

527

- 528 **Aigner PA. 2001.** Optimality modeling and fitness trade-offs: when should plants become  
529 pollinator specialists? *Oikos* **95**(1): 177-184.
- 530 **Aigner PA. 2006.** The evolution of specialized floral phenotypes in a fine-grained pollination  
531 environment. *Plant-pollinator interactions: From specialization to generalization* **23**:  
532 46.
- 533 **Alon U. 2003.** Biological networks: the tinkerer as an engineer. *Science* **301**(5641): 1866-  
534 1867.
- 535 **Arendse B. 2015.** *Variation in breeding systems and consequences for reproductive traits in*  
536 *Erica*. University of Cape Town.
- 537 **Armbruster WS, Tuxill JD, Flores TC, Vela JL. 1999.** Covariance and decoupling of floral  
538 and vegetative traits in nine Neotropical plants: a re-evaluation of Berg's  
539 correlation-pleiades concept. *American Journal of Botany* **86**(1): 39-55.
- 540 **Armbruster WS, Wege JA. 2018.** Detecting canalization and intra-floral modularity in  
541 triggerplant (*Stylidium*) flowers: correlations are only part of the story. *Annals of*  
542 *Botany* **123**(2): 355-372.
- 543 **Bardua C, Wilkinson M, Gower DJ, Sherratt E, Goswami A. 2019.** Morphological  
544 evolution and modularity of the caecilian skull. *BMC evolutionary biology* **19**(1): 30.
- 545 **Beaulieu JM, Jhwueng DC, Boettiger C, O'Meara BC. 2012.** Modeling stabilizing  
546 selection: expanding the Ornstein-Uhlenbeck model of adaptive evolution. *Evolution:*  
547 *International Journal of Organic Evolution* **66**(8): 2369-2383.
- 548 **Bell G. 1997.** *The basics of selection*: Springer Science & Business Media.
- 549 **Berg RL. 1960.** The ecological significance of correlation pleiades. *Evolution* **14**(2): 171-180.
- 550 **Bissell E, Diggle P. 2010.** Modular genetic architecture of floral morphology in *Nicotiana*:  
551 quantitative genetic and comparative phenotypic approaches to floral integration.  
552 *Journal of evolutionary biology* **23**(8): 1744-1758.
- 553 **Bissell EK, Diggle PK. 2008.** Floral morphology in *Nicotiana*: architectural and temporal  
554 effects on phenotypic integration. *International Journal of Plant Sciences* **169**(2): 225-  
555 240.
- 556 **Breiman L. 2001.** Random forests. *Machine learning* **45**(1): 5-32.
- 557 **Campbell DR. 1989.** Measurements of selection in a hermaphroditic plant: variation in male  
558 and female pollination success. *Evolution* **43**(2): 318-334.
- 559 **Campbell DR, Waser NM, Price MV, Lynch EA, Mitchell RJ. 1991.** Components of  
560 phenotypic selection: pollen export and flower corolla width in *Ipomopsis aggregata*.  
561 *Evolution* **45**(6): 1458-1467.
- 562 **Carvalho G, Medel R. 2005.** The modular structure of the floral phenotype in *Mimulus luteus*  
563 var. *luteus* (Phrymaceae). *Revista Chilena de Historia Natural* **78**(4).
- 564 **Chazot N, Panara S, Zilbermann N, Blandin P, Le Poul Y, Cornette R, Elias M, Debat**  
565 **V. 2016.** Morpho morphometrics: shared ancestry and selection drive the evolution of  
566 wing size and shape in *Morpho* butterflies. *Evolution* **70**(1): 181-194.
- 567 **Clavel J, Aristide L, Morlon H. 2018.** A Penalized Likelihood framework for high-  
568 dimensional phylogenetic comparative methods and an application to new-world  
569 monkeys brain evolution. *Systematic Biology* **68**(1): 93-116.
- 570 **Clavel J, Escarguel G, Merceron G. 2015.** mvMORPH: an R package for fitting  
571 multivariate evolutionary models to morphometric data. *Methods in Ecology and*  
572 *Evolution* **6**(11): 1311-1319.
- 573 **Cresswell J. 1998.** Stabilizing selection and the structural variability of flowers within  
574 species. *Annals of Botany* **81**(4): 463-473.

- 575 **Cresswell JE, Krick J, Patrick MA, Lahoubi M. 2010.** The aerodynamics and efficiency of  
576 wind pollination in grasses. *Functional Ecology* **24**(4): 706-713.
- 577 **Cullinan J, Strenberg K, Tribe G.** Simon's Town, Western Cape, South Africa: Ujube.  
578 **Diggle PK. 2014.** Modularity and intra-floral integration in metameric organisms: plants are  
579 more than the sum of their parts. *Phil. Trans. R. Soc. B* **369**(1649): 20130253.
- 580 **Drake AG, Klingenberg CP. 2010.** Large-scale diversification of skull shape in domestic  
581 dogs: disparity and modularity. *The American Naturalist* **175**(3): 289-301.
- 582 **Drummond AJ, Suchard MA, Xie D, Rambaut A. 2012.** Bayesian phylogenetics with  
583 BEAUti and the BEAST 1.7. *Molecular biology and evolution* **29**(8): 1969-1973.
- 584 **Edwards C, Weinig C. 2011.** The quantitative-genetic and QTL architecture of trait  
585 integration and modularity in *Brassica rapa* across simulated seasonal settings.  
586 *Heredity* **106**(4): 661.
- 587 **Ellis AG, Brockington SF, de Jager ML, Mellers G, Walker RH, Glover BJ. 2014.** Floral  
588 trait variation and integration as a function of sexual deception in *Gorteria diffusa*.  
589 *Phil. Trans. R. Soc. B* **369**(1649): 20130563.
- 590 **Escoufier Y. 1973.** Le traitement des variables vectorielles. *Biometrics*: 751-760.
- 591 **Estes S, Arnold SJ. 2007.** Resolving the paradox of stasis: models with stabilizing selection  
592 explain evolutionary divergence on all timescales. *The American Naturalist* **169**(2):  
593 227-244.
- 594 **Esteve Altava B. 2017.** In search of morphological modules: a systematic review.  
595 *Biological Reviews* **92**(3): 1332-1347.
- 596 **Fabbri M, Koch NM, Pritchard AC, Hanson M, Hoffman E, Bever GS, Balanoff AM,  
597 Morris ZS, Field DJ, Camacho J. 2017.** The skull roof tracks the brain during the  
598 evolution and development of reptiles including birds. *Nature ecology & evolution*  
599 **1**(10): 1543.
- 600 **Faegri K, Van Der Pijl L. 1966.** *Principles of pollination ecology*. Oxford, UK: Pergman  
601 Press.
- 602 **Fenster CB, Armbruster WS, Wilson P, Dudash MR, Thomson JD. 2004.** Pollination  
603 syndromes and floral specialization. *Annu. Rev. Ecol. Evol. Syst.* **35**: 375-403.
- 604 **Fern K, Fern A. 2012.** *Erica vagans* - L. U.K.: Plants For A Future (Company No. 3204567,  
605 Charity No. 1057719).
- 606 **Fornoni J, Ordano M, Pérez-Ishiwara R, Boege K, Domínguez CA. 2015.** A comparison  
607 of floral integration between selfing and outcrossing species: a meta-analysis. *Annals  
608 of Botany* **117**(2): 299-306.
- 609 **Geerts S. 2011.** *Assembly and disassembly of bird pollination communities at the Cape of  
610 Africa*. Stellenbosch: Stellenbosch University.
- 611 **Gil-López MJ, Segarra-Moragues JG, Ojeda F. 2014.** Population genetic structure of a  
612 sandstone specialist and a generalist heath species at two levels of sandstone  
613 patchiness across the Strait of Gibraltar. *PloS one* **9**(5): e98602.
- 614 **Gingerich P. 1983.** Rates of evolution: effects of time and temporal scaling. *Science* **222**:  
615 159-162.
- 616 **Goldblatt P, Manning JC. 2000.** The long-proboscid fly pollination system in southern  
617 Africa. *Annals of the Missouri Botanical Garden*: 146-170.
- 618 **Gomez JM, Perfectti F, Klingenberg CP. 2014.** The role of pollinator diversity in the  
619 evolution of corolla-shape integration in a pollination-generalist plant clade.  
620 *Philosophical Transactions of the Royal Society B-Biological Sciences* **369**(1649).
- 621 **Gomez JM, Torices R, Lorite J, Klingenberg CP, Perfectti F. 2016.** The role of pollinators  
622 in the evolution of corolla shape variation, disparity and integration in a highly  
623 diversified plant family with a conserved floral bauplan. *Annals of Botany* **117**(5):  
624 889-904.

- 625 **González AV, Murúa MM, Pérez F. 2015.** Floral integration and pollinator diversity in the  
626 generalized plant-pollinator system of *Alstroemeria ligtu* (Alstroemeriaceae).  
627 *Evolutionary ecology* **29**(1): 63-75.
- 628 **Gould SJ, Lewontin RC. 1979.** The spandrels of San Marco and the Panglossian paradigm: a  
629 critique of the adaptationist programme. *Proceedings of the Royal Society of London.*  
630 *Series B. Biological Sciences* **205**(1161): 581-598.
- 631 **Grant V, Grant KA. 1965.** Flower pollination in the Phlox family.
- 632 **Hansen TF, Carter AJ, Pélabon C. 2006.** On adaptive accuracy and precision in natural  
633 populations. *The American Naturalist* **168**(2): 168-181.
- 634 **Harmon LJ, Losos JB, Jonathan Davies T, Gillespie RG, Gittleman JL, Bryan Jennings**  
635 **W, Kozak KH, McPeck MA, Moreno Roark F, Near TJ. 2010.** Early bursts of  
636 body size and shape evolution are rare in comparative data. *Evolution: International*  
637 *Journal of Organic Evolution* **64**(8): 2385-2396.
- 638 **Hendry AP, Kinnison MT. 1999.** Perspective: the pace of modern life: measuring rates of  
639 contemporary microevolution. *Evolution* **53**(6): 1637-1653.
- 640 **Herrera CM. 1988.** Variation in mutualisms: the spatiotemporal mosaic of a pollinator  
641 assemblage. *Biological Journal of the Linnean Society* **35**(2): 95-125.
- 642 **Herrera CM. 2001.** Deconstructing a floral phenotype: do pollinators select for corolla  
643 integration in *Lavandula latifolia*? *Journal of evolutionary biology* **14**(4): 574-584.
- 644 **Herrera CM 2009.** Multiplicity in unity: plant subindividual variation and interactions with  
645 animals. University of Chicago Press, 1-4.
- 646 **Herrera CM, Cerdá X, García M, Guitián J, Medrano M, Rey PJ, Sánchez Lafuente A.**  
647 **2002.** Floral integration, phenotypic covariance structure and pollinator variation in  
648 bumblebee-pollinated *Helleborus foetidus*. *Journal of evolutionary biology* **15**(1):  
649 108-121.
- 650 **Herrera J. 1988.** Pollination relationships in southern Spanish Mediterranean shrublands. *The*  
651 *Journal of Ecology*: 274-287.
- 652 **Heystek A, Geerts S, Barnard P, Pauw A. 2014.** Pink flower preference in sunbirds does  
653 not translate into plant fitness differences in a polymorphic *Erica* species.  
654 *Evolutionary ecology* **28**(3): 457-470.
- 655 **Heywood JS, Michalski JS, McCann BK, Russo AD, Andres KJ, Hall AR, Middleton**  
656 **TC. 2017.** Genetic and environmental integration of the hawkmoth pollination  
657 syndrome in *Ruellia humilis* (Acanthaceae). *Annals of Botany* **119**(7): 1143-1155.
- 658 **Hulsey CD, de León FG, Rodiles Hernández R. 2006.** Micro and macroevolutionary  
659 decoupling of cichlid jaws: a test of Liem's key innovation hypothesis. *Evolution*  
660 **60**(10): 2096-2109.
- 661 **Johnson SD. 2006.** Pollinator-driven speciation in plants. *Ecology and evolution of flowers:*  
662 295-310.
- 663 **Johnson SD, Steiner KE. 2000.** Generalization versus specialization in plant pollination  
664 systems. *Trends in ecology & evolution* **15**(4): 140-143.
- 665 **Joly S, Lambert F, Alexandre H, Clavel J, Léveillé Bourret É, Clark JL. 2018.** Greater  
666 pollination generalization is not associated with reduced constraints on corolla shape  
667 in Antillean plants. *Evolution* **72**(2): 244-260.
- 668 **Kashtan N, Alon U. 2005.** Spontaneous evolution of modularity and network motifs.  
669 *Proceedings of the National Academy of Sciences* **102**(39): 13773-13778.
- 670 **Kashtan N, Noor E, Alon U. 2007.** Varying environments can speed up evolution.  
671 *Proceedings of the National Academy of Sciences* **104**(34): 13711-13716.
- 672 **Kelber A, Jacobs GH 2016.** Evolution of color vision. *Human Color Vision:* Springer, 317-  
673 354.

- 674 **Kirsten H, Hogeweg P. 2011.** Evolution of networks for body plan patterning; interplay of  
675 modularity, robustness and evolvability. *PLoS computational biology* **7**(10):  
676 e1002208.
- 677 **Klingenberg CP. 2009.** Morphometric integration and modularity in configurations of  
678 landmarks: tools for evaluating a priori hypotheses. *Evolution & development* **11**(4):  
679 405-421.
- 680 **Klingenberg CP. 2011.** MorphoJ: an integrated software package for geometric  
681 morphometrics. *Molecular Ecology Resources* **11**: 353-357.
- 682 **Klingenberg CP. 2014.** Studying morphological integration and modularity at multiple  
683 levels: concepts and analysis. *Philosophical Transactions of the Royal Society B-*  
684 *Biological Sciences* **369**(1649).
- 685 **Klingenberg CP, Debat V, Roff DA. 2010.** Quantitative genetics of shape in cricket wings:  
686 developmental integration in a functional structure. *Evolution: International Journal*  
687 *of Organic Evolution* **64**(10): 2935-2951.
- 688 **Klingenberg CP, Marugan-Lobon J. 2013.** Evolutionary Covariation in Geometric  
689 Morphometric Data: Analyzing Integration, Modularity, and Allometry in a  
690 Phylogenetic Context. *Systematic Biology* **62**(4): 591-610.
- 691 **Linder HP, Johnson SD, Kuhlmann M, Matthee CA, Nyffeler R, Swartz ER. 2010.** Biotic  
692 diversity in the Southern African winter-rainfall region. *Current opinion in*  
693 *environmental sustainability* **2**(1-2): 109-116.
- 694 **Losos JB, Miles DB. 2002.** Testing the hypothesis that a clade has adaptively radiated:  
695 iguanid lizard clades as a case study. *The American Naturalist* **160**(2): 147-157.
- 696 **Lynch M. 1990.** The rate of morphological evolution in mammals from the standpoint of the  
697 neutral expectation. *The American Naturalist* **136**(6): 727-741.
- 698 **McAdams HH, Srinivasan B, Arkin AP. 2004.** The evolution of genetic regulatory systems  
699 in bacteria. *Nature Reviews Genetics* **5**(3): 169-178.
- 700 **Meng JL, Zhou XH, Zhao ZG, Du GZ. 2008.** Covariance of floral and vegetative traits in  
701 four species of Ranunculaceae: a comparison between specialized and generalized  
702 pollination systems. *Journal of integrative plant biology* **50**(9): 1161-1170.
- 703 **Morlon H, Lewitus E, Condamine FL, Manceau M, Clavel J, Drury J. 2016.** RPANDA:  
704 an R package for macroevolutionary analyses on phylogenetic trees. *Methods in*  
705 *Ecology and Evolution* **7**(5): 589-597.
- 706 **Morris JL, Puttick MN, Clark JW, Edwards D, Kenrick P, Pressel S, Wellman CH,**  
707 **Yang Z, Schneider H, Donoghue PCJ. 2018.** The timescale of early land plant  
708 evolution. *Proc Natl Acad Sci U S A* **115**(10): E2274-E2283.
- 709 **Muchhala N. 2006.** The pollination biology of Burmeistera (Campanulaceae): specialization  
710 and syndromes. *American Journal of Botany* **93**(8): 1081-1089.
- 711 **Notten A 2012.** Erica brachialis Salisb. In PlantZAfrica, Institute SANB. South Africa:  
712 Kirstenbosch National Botanical Garden.
- 713 **Ordano M, Fornoni J, Boege K, Domínguez CA. 2008.** The adaptive value of phenotypic  
714 floral integration. *New Phytologist* **179**(4): 1183-1192.
- 715 **Pérez-Barrales R, Simón-Porcar VI, Santos-Gally R, Arroyo J. 2014.** Phenotypic  
716 integration in style dimorphic daffodils (Narcissus, Amaryllidaceae) with different  
717 pollinators. *Phil. Trans. R. Soc. B* **369**(1649): 20130258.
- 718 **Pérez Barrales R, Arroyo J, Scott Armbruster W. 2007.** Differences in pollinator faunas  
719 may generate geographic differences in floral morphology and integration in Narcissus  
720 papyraceus (Amaryllidaceae). *Oikos* **116**(11): 1904-1918.
- 721 **Pérez F, Arroyo MT, Medel R. 2007.** Phylogenetic analysis of floral integration in  
722 Schizanthus (Solanaceae): does pollination truly integrate corolla traits? *Journal of*  
723 *evolutionary biology* **20**(5): 1730-1738.

- 724 **Pigliucci M, Preston K. 2004.** *Phenotypic integration: studying the ecology and evolution of*  
725 *complex phenotypes*: Oxford University Press.
- 726 **Pirie M, Oliver E, De Kuppler AM, Gehrke B, Le Maitre N, Kandziora M, Bellstedt D.**  
727 **2016.** The biodiversity hotspot as evolutionary hot-bed: spectacular radiation of Erica  
728 in the Cape Floristic Region. *BMC evolutionary biology* **16**(1): 190.
- 729 **Pirie MD, Oliver E, Bellstedt DU. 2011.** A densely sampled ITS phylogeny of the Cape  
730 flagship genus Erica L. suggests numerous shifts in floral macro-morphology.  
731 *Molecular phylogenetics and evolution* **61**(2): 593-601.
- 732 **Plants\_Database 2019.** Cornish Heath (Erica vagans). In Association NG. U.S.A.
- 733 **Rebello A, Siegfried W, Crowe A. 1984.** Avian pollinators and the pollination syndromes of  
734 selected mountain fynbos plants. *South African Journal of Botany* **3**(5): 285-296.
- 735 **Rebello A, Siegfried W, Oliver E. 1985.** Pollination syndromes of Erica species in the south-  
736 western Cape. *South African Journal of Botany* **51**(4): 270-280.
- 737 **Revell LJ. 2012.** phytools: an R package for phylogenetic comparative biology (and other  
738 things). *Methods in Ecology and Evolution* **3**(2): 217-223.
- 739 **Roopnarine PD. 2003.** Analysis of rates of morphologic evolution. *Annual Review of*  
740 *Ecology, Evolution, and Systematics* **34**(1): 605-632.
- 741 **Rosas □ Guerrero V, Quesada M, Armbruster WS, Pérez □ Barrales R, Smith SD. 2011.**  
742 Influence of pollination specialization and breeding system on floral integration and  
743 phenotypic variation in Ipomoea. *Evolution: International Journal of Organic*  
744 *Evolution* **65**(2): 350-364.
- 745 **Sahli HF, Conner JK. 2011.** Testing for conflicting and nonadditive selection: floral  
746 adaptation to multiple pollinators through male and female fitness. *Evolution:*  
747 *International Journal of Organic Evolution* **65**(5): 1457-1473.
- 748 **Schlager S 2017.** Morpho and Rvcg–Shape Analysis in R: R-Packages for geometric  
749 morphometrics, shape analysis and surface manipulations. *Statistical shape and*  
750 *deformation analysis*: Elsevier, 217-256.
- 751 **Schluter D. 2000.** *The ecology of adaptive radiation*: OUP Oxford.
- 752 **Simpson GG. 1944.** *Tempo and mode in evolution*: Columbia University Press.
- 753 **Staedler YM, Masson D, Schönenberger J. 2013.** Plant tissues in 3D via X-ray  
754 tomography: simple contrasting methods allow high resolution imaging. *PloS one*  
755 **8**(9): e75295.
- 756 **Stebbins GL. 1950.** *Variation and evolution in plants*: Geoffrey Cumberlege.; London.
- 757 **Stebbins GL. 1970.** Adaptive radiation of reproductive characteristics in angiosperms, I:  
758 pollination mechanisms. *Annual Review of Ecology and Systematics* **1**(1): 307-326.
- 759 **Stevens P, Luteyn J, Oliver E, Bell T, Brown E, Crowden R, George A, Jordan G, Ladd**  
760 **P, Lemson K 2004.** Ericaceae. *Flowering Plants· Dicotyledons*: Springer, 145-194.
- 761 **Theophrastus ToE, Hort SA 1916.** Of the parts of plants and their composition. Of  
762 classification. *Inquiry Into Plants and Minor Works on Odours and Weather Signs*:  
763 Heinemann.
- 764 **Turner R 2010.** Sunbird Surprise! Surprises in the world of plant pollination. *Full Circle*  
765 *Magazine*. U.K.: Full Circle Team. 34.
- 766 **Vogel S 1954.** Blütenbiologische Typen als Elemente der Sipplgliederung: Fischer—Jena.
- 767 **Wagner GP, Altenberg L. 1996.** Perspective: complex adaptations and the evolution of  
768 evolvability. *Evolution* **50**(3): 967-976.
- 769 **Wagner GP, Pavlicev M, Cheverud JM. 2007.** The road to modularity. *Nature Reviews*  
770 *Genetics* **8**(12): 921-931.
- 771 **Weismann A. 1892.** *Das Keimplasma: eine theorie der Vererbung*: Fischer.
- 772 **Wiley DF, Amenta N, Alcantara DA, Ghosh D, Kil YJ, Delson E, Harcourt-Smith W,**  
773 **Rohlf FJ, St John K, Hamann B 2005.** Evolutionary morphing. *VIS 05. IEEE*  
774 *Visualization, 2005.*: IEEE. 431-438.



775 **Young NM. 2006.** Function, ontogeny and canalization of shape variance in the primate  
776 scapula. *Journal of Anatomy* **209**(5): 623-636.  
777  
778

779 **Figure legends:**

780

781 **Figure 1 Hypotheses.** Modularity hypotheses tested displayed on schematic representation of  
782 an *Erica* flower. (a) the *attraction-reproduction* hypothesis proposes that floral organs groups  
783 into fertile (stamens and carpel, in red) versus sterile (sepals and petals, in blue) modules. (b)  
784 the *efficiency* hypothesis 1 proposes that parts of the flower group in modules directly  
785 involved in pollen receipt (joining of the petals and stigma, in red) and deposition (rest of the  
786 corolla mouth and stamens, in yellow), and modules that are not (remainder of the flower in  
787 blue). (c) the *efficiency* hypothesis 2 proposes that parts of the flower that restrict access to the  
788 floral reward (floral neck, in yellow) form a module, that the carpels form a module, and that  
789 the rest of the flower also forms a module. (d) the *developmental* hypothesis proposes that  
790 parts for the flower group into modules corresponding to their organ identity: sepals (green),  
791 petals (blue), stamens (yellow), or carpels (red).

792

793 **Figure 2 Landmarks.** Landmarks used to digitise the shape of *Erica* flowers. (a) on  
794 schematic longitudinal section diagramme of an *Erica* flower. (b) on a 3D model of an  
795 actinomorphic flower (*E. hirtiflora*). (c) on a 3D model of a zygomorphic flower (*E.*  
796 *leucotrachela*).

797

798 **Figure 3 Shape PCA & syndromes.** Two-dimensional ordination plot from a PCA analysis  
799 of 33 landmarks and 209 individual flowers of 19 *Erica* species. A representative flower  
800 surface-model for each species is plotted next to the dots corresponding to individual flowers  
801 of the same species. Colour and shape coding: green-blue circles, generalist syndrome,  
802 orange-red squares, bird syndrome, pink and purple triangles long-proboscid fly syndrome,  
803 grey crosses, wind syndrome. Closed symbols: observed visitors, open symbols: predicted  
804 visitors. Loadings of axes: x-axis PC1: 38.9% of shape variation, y-axis PC2: 22.1% of shape  
805 variation. In order to illustrate changes in floral shape associated with PC1 and PC2, a flower  
806 from the centre of the morphospace (*E. hirtiflora*) was distorted according to PC1 and PC2  
807 and plotted along their respective axes.

808

809 **Figure 4 Modules in *Erica* flowers.** (a) the best supported partition in flowers with generalist  
810 syndrome is the *developmental* hypothesis: a 4-fold partition with each organ class forms one  
811 module. (b) the best supported partition in the flowers with bird syndrome is the *efficiency*  
812 hypothesis 1, where the corolla lobes and the stamen form a putative “pollen deposition

813 module”, and joining of the upper corolla lobes and the stigma form a putative “pollen receipt  
814 module”. The third set of landmarks comprises the rest of the flower. (c) the best supported  
815 partition in flowers with long-proboscid fly syndrome is the *efficiency* hypothesis 2, where the  
816 landmarks on the narrow corolla aperture form a putative “restriction module” that restricts  
817 access to the floral reward to only insects with very narrow proboscises. A second set of  
818 landmarks is formed by the gynoecium, and a third set of landmarks comprises the rest of the  
819 flower. (d) the best supported partition in flowers with wind syndrome the *developmental*  
820 hypothesis: a 4-fold partition with each organ class forms one module. Pollinator drawings,  
821 originals. Generalists represented by drawing of bee. Character representing the wind: Zephyr  
822 from “The birth of Venus” by Sandro Boticelli (ca. 1480).

823

824 **Figure 5 Ancestral state reconstruction for pollination syndromes and floral shape in**  
825 ***Erica*.** (a) stochastic character mapping of the four pollination syndromes optimised on a  
826 chronogram inferred from Bayesian dating. Pie charts at internal nodes indicate the proportion  
827 of stochastic mapping from 1000 runs using the Equal Rates (ER) model. (b) ancestral shape  
828 reconstruction and reconstructed evolutionary trajectories for six selected species of *Erica*,  
829 including species from all four studied pollination syndromes and two convergent evolution  
830 of flowers with long-proboscid fly syndrome.

831

832 **Figure S1 Machine learning.** (a) landmark coordinates and tube length sorted by mean  
833 accuracy decrease in predicting pollination syndrome via Random Forest (the tube length is  
834 the best variable to predict pollination syndrome). (b) tube length (in mm) in studied species.

835

836 **Figure S2 Hypotheses test: RV distributions.** X-axis RV coefficient, y-axis frequency of  
837 values. Red arrow indicates the value of the RV coefficient of the modularity hypothesis  
838 tested. Left, hypotheses tested, right results of test. a-d tests for species with generalist  
839 syndrome. a, test of *attraction-reproduction* hypothesis. b, test for *efficiency* hypothesis 1. c,  
840 test for *efficiency* hypothesis 2. d, test for *developmental* hypothesis. e-h tests for species with  
841 bird syndrome. e, test of *attraction-reproduction* hypothesis. f, test for *efficiency* hypothesis 1.  
842 g, test for *efficiency* hypothesis 2. h, test for *developmental* hypothesis. i-l tests for species  
843 with long-proboscid fly syndrome. i, test of *attraction-reproduction* hypothesis. j, test for  
844 *efficiency* hypothesis 1. k, test for *efficiency* hypothesis 2. l, test for *developmental* hypothesis.  
845 m-p tests for species with wind syndrome. m, test of *attraction-reproduction* hypothesis. n,  
846 test for *efficiency* hypothesis 1. o, test for *efficiency* hypothesis 2. p, test for *developmental*

847 hypothesis. Pollinator drawings, originals. Generalists represented by drawing of bee.  
848 Character representing the wind: Zephyr from “The birth of Venus” by Sandro Boticelli (ca.  
849 1480).

850

851 **Figure S3 Allometry in *Erica* flowers.** (a) allometric plot. x-axis, log centroid size, y-axis  
852 shape axis. All 209 individual flowers from all 19 species studied are plotted. Blue to green  
853 dots generalist syndrome, orange to red squares bird syndrome, pink and purple triangles  
854 long-proboscid fly syndrome, gray crosses wind syndrome. (b) allometric deformation in  
855 flowers with long-proboscid syndrome for a change in log centroid size of 0.2. Pink,  
856 schematic drawing of smaller flowers, blue schematic drawing of larger flowers. (c)  
857 allometric deformation in flowers with wind syndrome for a change in log centroid size of  
858 0.2. Pink, schematic drawing of smaller flowers, blue schematic drawing of larger flowers.  
859

860 **List of supplementary data:**

861

862 **Table S1.** Species, sample numbers (n) and scanning conditions of *Erica* flowers.

863 **Table S2.** Landmarks used to digitise the shape of *Erica* flowers, and modules to which they

864 belong in the modularity hypotheses tested.

865 **Table S3.** Species-level average values for size and integration.

866 **Table S4.** Genbank accession numbers for nrDNA ITS and cpDNA trnL-F-ndhJ and trnT-L  
867 sequence data.

868 **Table S5.** Discrete character mapping models for pollination syndromes.

869 **Table S6.** Main variables mean accuracy decrease of random forest syndrome prediction.

870 **Table S7.** Corolla tube length per flower.

871 **Table S8.** Classification of 114 individual flowers of diverse *Erica* species into the  
872 pollination syndromes,

873 **Table S9.** Support values evolutionary models of floral shape evolution.

874 **Table S10.** Summary of the preferred models of evolution for seven phenotypic trait variables  
875 (PC1-5 of floral shape, centroid size, and integration

876 **Methods S1.** This file contains details of the methodology used to for: X-ray tomography,  
877 3D-landmarking, geometric morphometrics, pollination syndrome prediction, modularity  
878 analyses (exploratory and confirmatory approaches), phylogenetic inference, ancestral  
879 character states reconstruction, and models of trait evolution.

880 **Notes S1.** Literature analysis.

881 **Notes S2.** Allometric regressions and correlation between the corolla tube length and centroid  
882 size

883 **Scan data.** All the scan data will be deposited on PHAIDRA, the open data repository of the

884 University of Vienna (<https://phaidra.univie.ac.at/>).

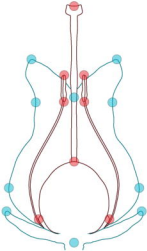

**(a)** Attraction-reproduction

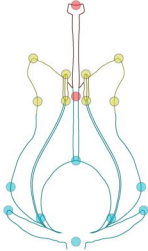

**(b)** Efficiency 1

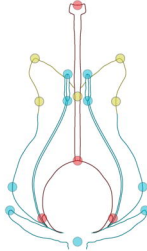

**(c)** Efficiency 2

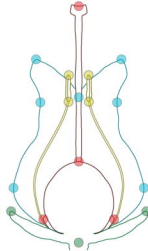

**(d)** Developmental

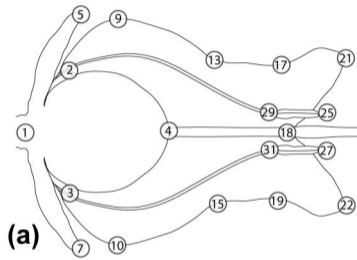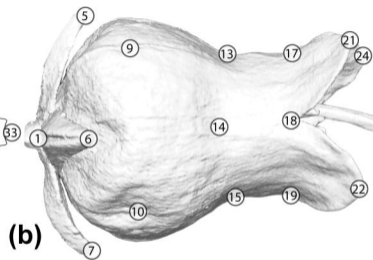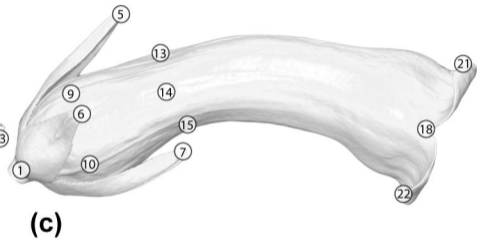

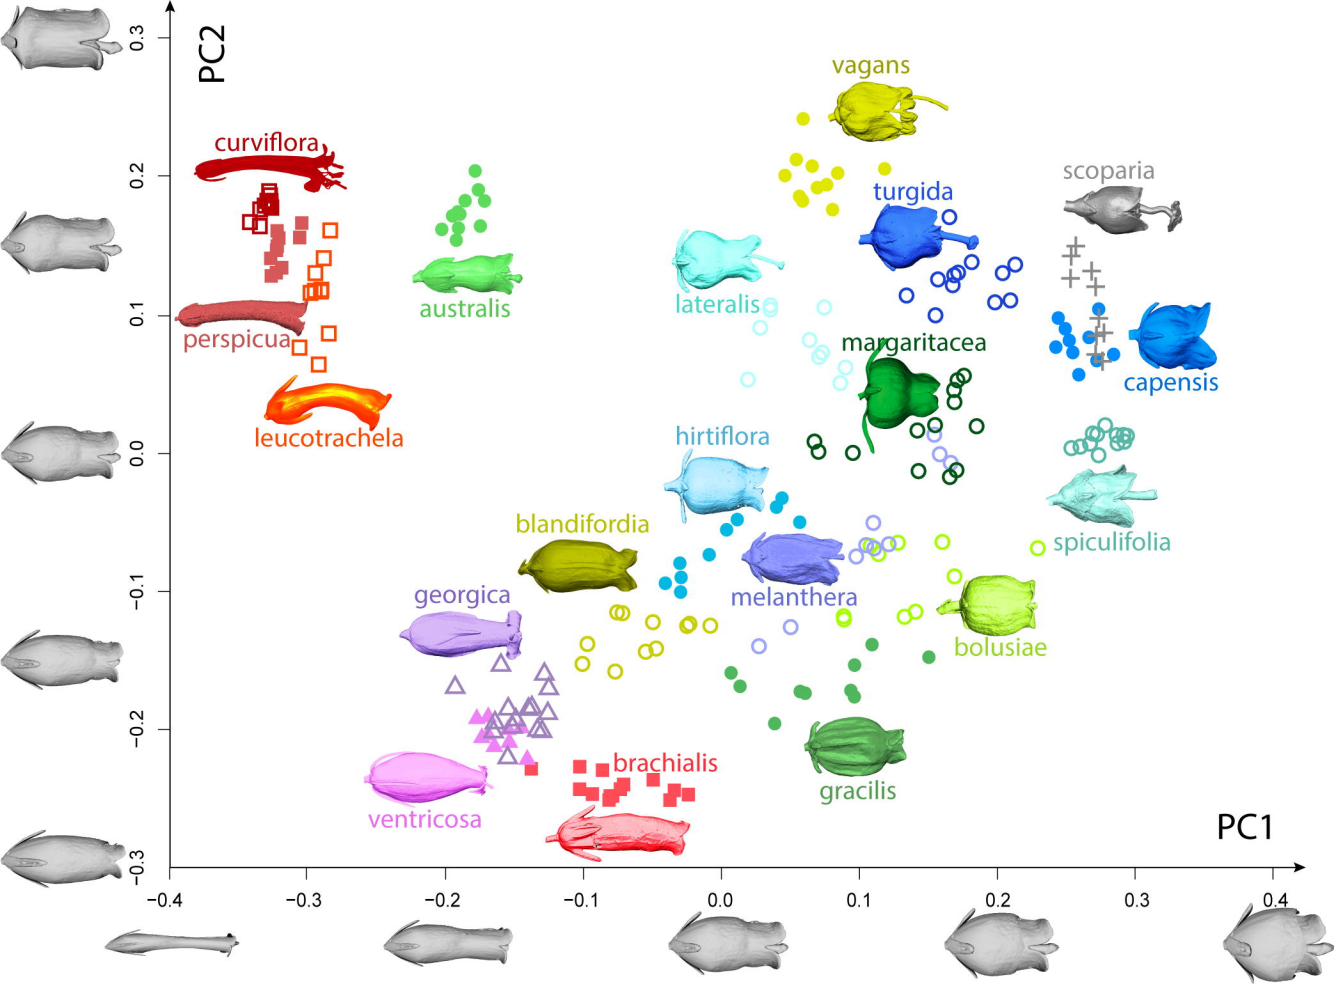



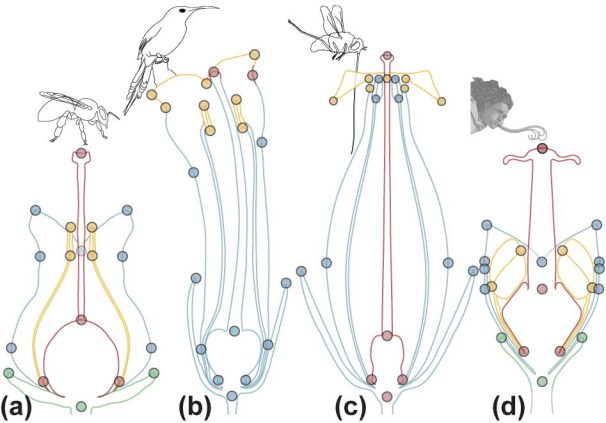

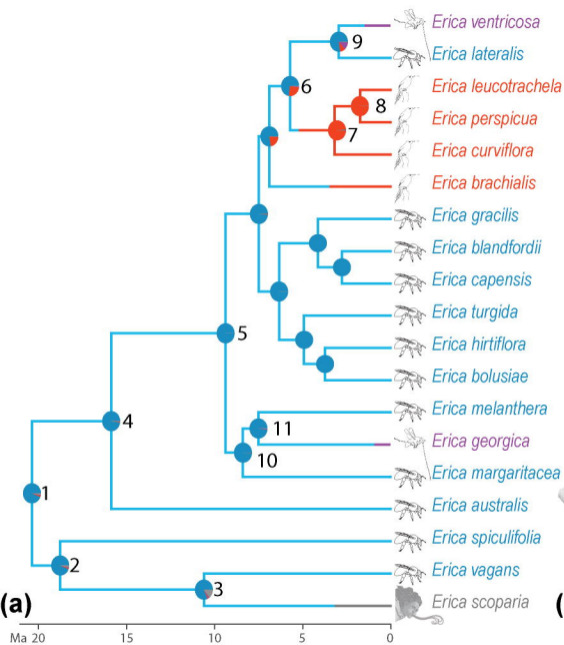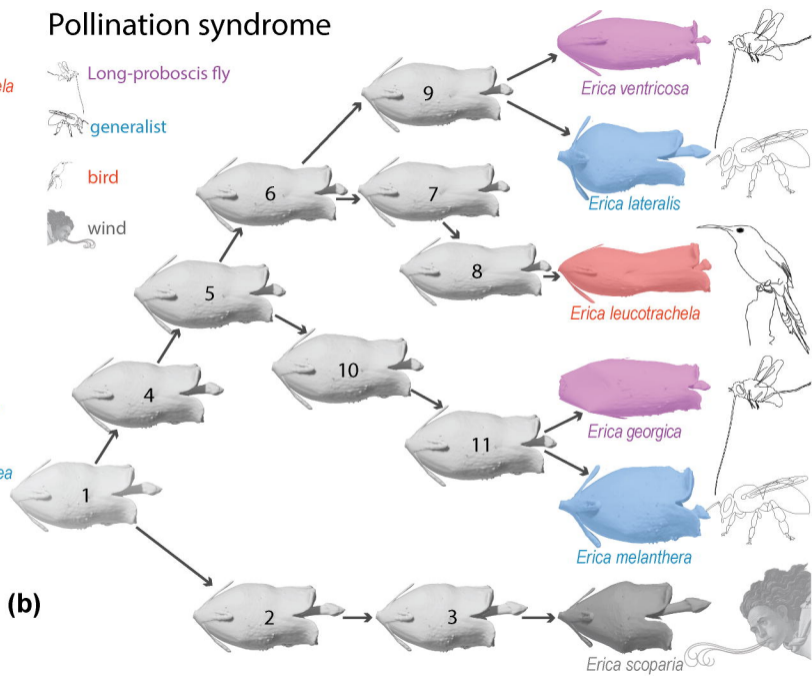

Source: https://www.biorxiv.org/content/10.1101/628644v1.full.pdf
